# Supplementary material
Source: PubMed Central journal article supplement (PMC4376658)
Supplement: NIHMS661102-supplement-1.pdf [file NIHMS661102-supplement-1.pdf]

## Materials and Methods

### **Clinical Predictors**

A medical history was prospectively recorded for all patients (1-3) by a physician or research nurse, and each patient's risk of future cardiac event was then estimated using National Cholesterol Education Program/Adult Treatment Panel (NCEP/ATP) III guidelines (4, 1). Dyslipidemia was defined as known but untreated dyslipidemia or current treatment with lipid-lowering medications based upon a diagnosis of dyslipidemia in direct accordance to societal guidelines.

### **Coronary CT Angiography Measures**

Coronary CTA image acquisition was performed using single- or dual-source 64-slice CT scanners. All acquisitions and interpretations were performed in direct accordance with the Society of Cardiovascular Computed Tomography Guidelines (5, 6, 1). Using a segment model, each segment was classified as "normal" (no detectable plaque) or as having non-obstructive coronary atherosclerotic plaque (1-49% diameter stenosis). For each patient, the segment score (sum of the coronary segments with coronary atherosclerosis) was calculated (7,8).

### **Patient Follow-up**

Patient follow-up (all-cause mortality) was performed by each local institution by telephone interview with validation of reported death through medical records whenever possible and/or a National death registry.

### **Statistical Analysis**

Statistical analyses were performed using SAS (version 9.2, SAS Institute Inc., Cary, North Carolina), and p value <0.05 was considered statistically significant. Continuous variables were presented as means and standard deviations and if not normally distributed, presented as medians with interquartile range. Categorical variables were presented as frequencies with percentages. For baseline characteristics comparisons, the Wilcoxon rank-sum test was used for continuous variables, and the chi-squared statistic or Fisher's exact test was used for categorical variables.

The prognostic value of non-obstructive CAD by coronary CTA, statin and aspirin therapy was assessed for univariable association as well as multivariable association

with all-cause mortality. Unadjusted comparisons of all-cause mortality according to presence and extent of non-obstructive CAD, NCEP/ATP III risk and therapy were performed on Kaplan-Meier survival curves using log-rank tests. Risk-adjusted analysis was performed using a multivariable Cox proportional hazard model to determine the effect of therapy (aspirin or statin) on incident mortality by controlling for age, gender, CAD pre-test risk (NCEP/ATP III). Cox proportional hazard models were also used to test for interactions between the therapy and CAD group and also in the various subgroups. Model overfitting was carefully considered and the proportional hazards assumption was met in all analyses.

#### REFERENCES:

1. Min JK, Dunning A, Lin FY, et al. Rationale and design of the CONFIRM (COroNary CT Angiography EvaluatioN For Clinical Outcomes: An InteRnational Multicenter) Registry. *J Cardiovasc Comput Tomogr* 2011; 5:84-92.
2. Diamond GA, Forrester JS. Analysis of probability as an aid in the clinical diagnosis of coronary-artery disease. *N Engl J Med* 1979; 300:1350-8.
3. Gibbons RJ, Chatterjee K, Daley J, et al. ACC/AHA/ACP-ASIM guidelines for the management of patients with chronic stable angina: a report of the American College of Cardiology/American Heart Association Task Force on Practice Guidelines (Committee on Management of Patients With Chronic Stable Angina). *J Am Coll Cardiol* 1999; 33:2092-197.
4. National Cholesterol Education Program Expert Panel on Detection...Final Report Washington DE. National Institutes of Health 2009.
5. Chow BJW, Abraham A, Wells GA, Chen L, Ruddy TD, Yam Y, Govas N, Galbraith PD, Dennie C, Beanlands RS. Diagnostic accuracy and impact of computed tomographic coronary angiography on utilization of invasive coronary angiography. *Circ Cardiovasc Imag* 2009; 2:16-23.
6. Chow BJ, Wells GA, Chen L, Yam Y, Galiwango P, Abraham A, Sheth T, Dennie C, Beanlands RS, Ruddy TD. Prognostic value of 64-slice cardiac computed tomography severity of coronary artery disease, coronary atherosclerosis, and left ventricular ejection fraction. *J Am Coll Cardiol* 2010; 55:1017-28.
7. Chow BJ, Wells GA, Chen L, Yam Y, Galiwango P, Abraham A, Sheth T, Dennie C, Beanlands RS, Ruddy TD. Prognostic value of 64-slice cardiac computed

tomography: Severity of coronary artery disease, coronary atherosclerosis and left ventricular ejection fraction. J Am Coll Cardiol 2010; 55:1017-28.

8. Min JK, Shaw LJ, Devereux RB, Okin PM, Weinsaft JW, Russo DJ, Lippolis NJ, Berman DS, Callister TQ. Prognostic value of multidetector coronary computed tomographic angiography for prediction of all-cause mortality. J Am Coll Cardiol 2007; 50:1161-70.
